# Supplementary material
Source: PubMed Central journal article supplement (PMC8753447)
Supplement: jitc-2020-001314supp001.pdf [file jitc-2020-001314supp001.pdf]

**Supplementary Table S1.** Generalized variance inflation factors for candidate predictors of mortality among patients with COVID-19 and solid tumor

| Variables                             | GVIF <sup>[1/(2×df)]</sup> |        |
|---------------------------------------|----------------------------|--------|
|                                       | Step 1                     | Step 2 |
| Age                                   | 1.45                       | 1.41   |
| Sex                                   |                            |        |
| Male vs female                        | 1.41                       | 1.31   |
| Cancer type                           | 1.23                       | 1.17   |
| Cancer stage                          | 1.27                       | 1.28   |
| Receipt of antitumor treatment        | 1.42                       | 1.49   |
| WBC count, ×10 <sup>9</sup> /L        |                            |        |
| ≥6.93 vs <6.93                        | 6.07                       | 1.59   |
| Lymphocyte count, ×10 <sup>9</sup> /L |                            |        |
| ≤0.70 vs >0.70                        | 1.44                       | 1.46   |
| Neutrophil count, ×10 <sup>9</sup> /L |                            |        |
| ≥5.82 vs <5.82                        | 6.24                       | —      |
| NLR                                   |                            |        |
| ≥7.05 vs <7.05                        | 2.11                       | 2.11   |
| dNLR                                  |                            |        |
| ≥4.19 vs <4.19                        | 2.04                       | 2.08   |
| COPD                                  | 1.14                       | 1.13   |
| Dyspnea                               | 1.53                       | 1.54   |
| Fatigue                               | 1.33                       | 1.29   |

Abbreviations: GVIF, generalized variance inflation factor; *df*, degree of freedom; WBC, white blood cell; NLR, neutrophil-to-lymphocyte ratio; dNLR, derived NLR; COPD, chronic obstructive pulmonary disease.

Neutrophil count, being the variable with the largest GVIF<sup>[1/(2×df)]</sup> at step 1, was excluded.

At step 2, the GVIF<sup>[1/(2×df)]</sup> for all remaining variables was smaller than the threshold of 2.24 (i.e., 5<sup>[1/2]</sup>), thus these variables were not excluded and were considered for further analysis.
