# Supplementary material
Source: PubMed Central journal article supplement (PMC8753447)
Supplement: jitc-2020-001314supp004.pdf [file jitc-2020-001314supp004.pdf]

**Supplementary Table S2** Results of multivariate logistic regression models in the sensitivity analysis.

| Variables                                         | Model with heart rate |       | Model with respiratory rate |       |
|---------------------------------------------------|-----------------------|-------|-----------------------------|-------|
|                                                   | OR (95% CI)           | P     | OR (95% CI)                 | P     |
| Age, years                                        | 1.08 (1.00–1.17)      | 0.047 | 1.09 (1.00–1.17)            | 0.040 |
| WBC count<br>≥ 6.93 vs < 6.93 ×10 <sup>9</sup> /L | 11.60 (1.95–68.88)    | 0.007 | 16.08 (2.58–100.45)         | 0.003 |
| dNLR<br>≥4.19 vs <4.19                            | 19.83 (3.57–110.15)   | 0.001 | 17.71 (3.36–93.36)          | 0.001 |
| Cancer stage                                      | 1.61 (0.76–3.39)      | 0.210 | 1.59 (0.75–3.35)            | 0.228 |
| Receipt of antitumor treatment                    | 20.03 (2.52–158.98)   | 0.005 | 26.61 (3.34–212.04)         | 0.002 |
| Heart rate, bpm                                   | 1.04 (0.99–1.09)      | 0.125 | —                           | —     |
| Respiratory rate, breaths per minute              | —                     | —     | 1.11 (0.91–1.36)            | 0.285 |
| Dyspnea                                           | 16.57 (2.69–102.05)   | 0.002 | 19.24 (3.23–114.74)         | 0.001 |

Abbreviations: COVID-19, coronavirus disease 2019; OR, odds ratio; 95% CI, 95% confidence interval; WBC, peripheral white blood cell.

The sample size for fitting the model was 156.
