# Supplementary material
Source: PubMed Central journal article supplement (PMC8753447)
Supplement: jitc-2020-001314supp005.pdf [file jitc-2020-001314supp005.pdf]

**Supplementary Table S3** Number of patients receiving different kinds of antitumor treatments.

| Receipt of antitumor treatment | All Patients   | Groups        |               |
|--------------------------------|----------------|---------------|---------------|
|                                |                | Non-Survivors | Survivors     |
| <b>Yes</b>                     |                |               |               |
| Surgery                        | 20/186 (10.8)  | 6/26 (23.1)   | 14/160 (8.8)  |
| Chemotherapy                   | 32/186 (17.2)  | 7/26 (26.9)   | 25/160 (15.6) |
| Radiotherapy                   | 6/186 (3.2)    | 2/26 (7.7)    | 4/160 (2.5)   |
| Targeted therapy               | 8/186 (4.3)    | 2/26 (7.7)    | 6/160 (3.8)   |
| Immunotherapy                  | 2/186 (1.1)    | 0/26 (0.0)    | 2/160 (1.2)   |
| Endocrine therapy              | 3/186 (1.6)    | 0/26 (0.0)    | 3/160 (1.9)   |
| Others <sup>a</sup>            | 3/186 (1.6)    | 0/26 (0.0)    | 3/160 (1.9)   |
| Unknown treatment              | 4/186 (2.2)    | 0/26 (0.0)    | 4/160 (2.5)   |
| <b>No</b>                      | 108/186 (58.1) | 9/26 (34.6)   | 99/160 (61.9) |

Note: Data were expressed as counts and percentages.

<sup>a</sup> Others included immunotherapy combined with chemotherapy and targeted therapy combined with immunotherapy.
