# Supplementary material
Source: PubMed Central journal article supplement (PMC8753447)

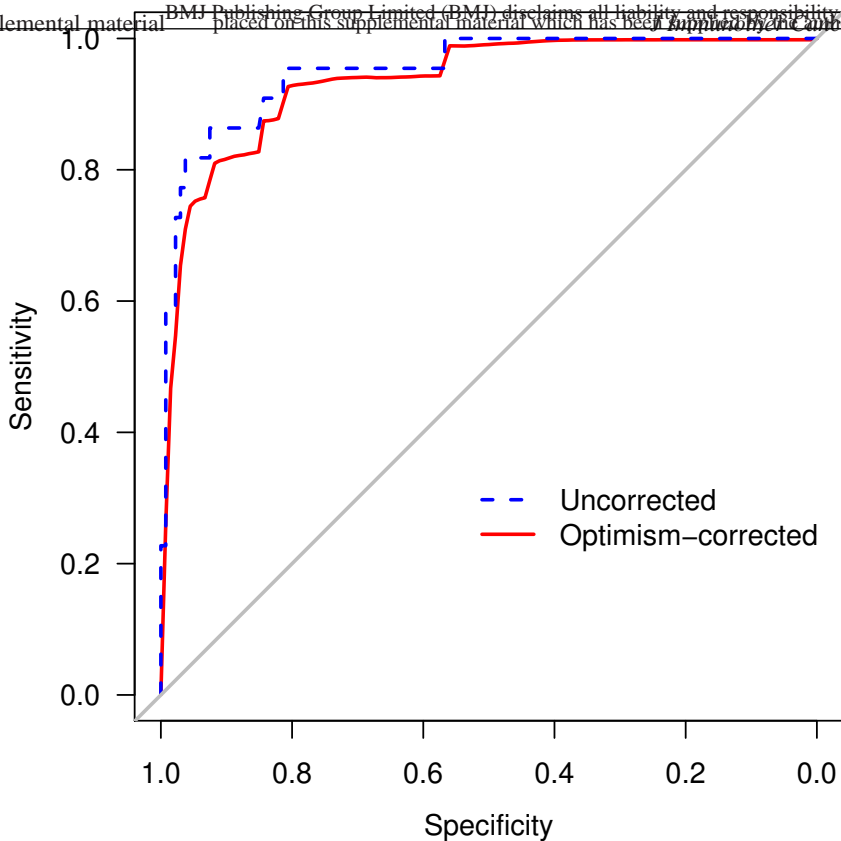

Supplement: jitc-2020-001314supp002.pdf [file jitc-2020-001314supp002.pdf]

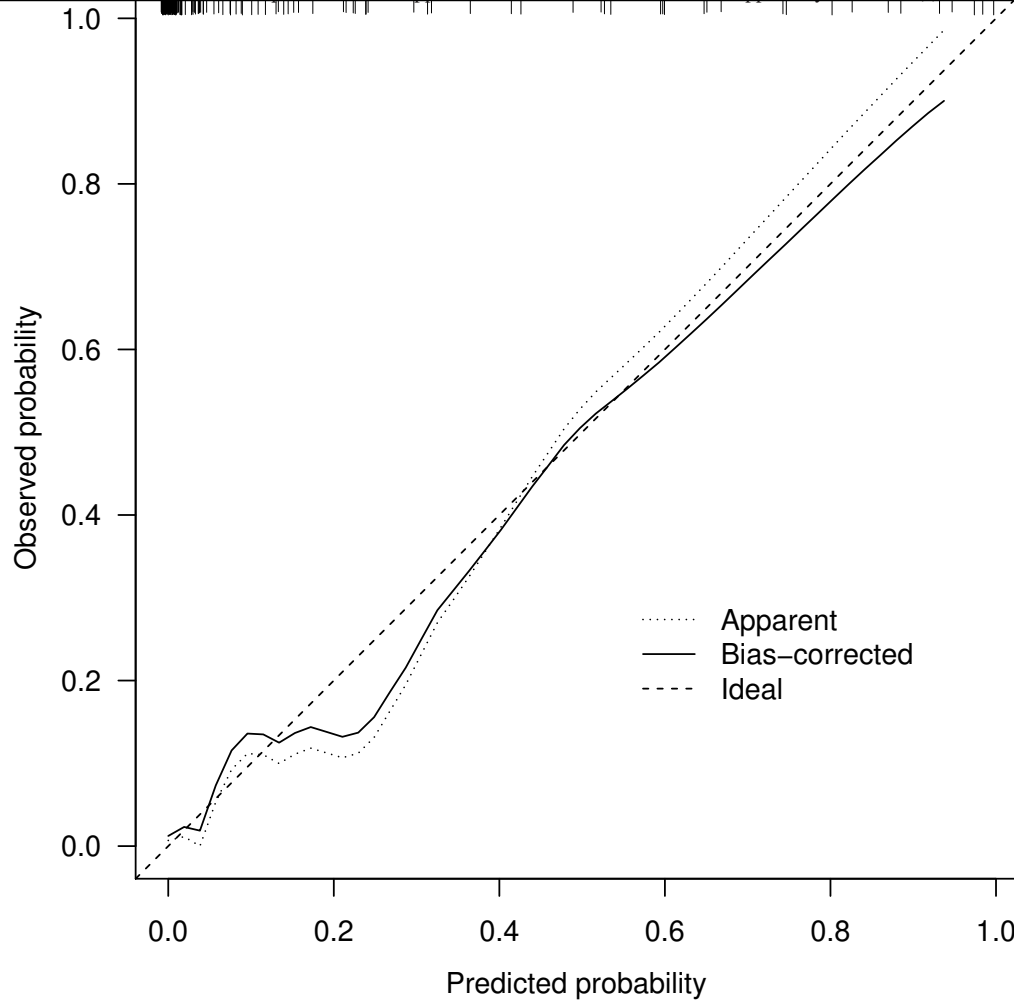

Supplement: jitc-2020-001314supp003.pdf [file jitc-2020-001314supp003.pdf]
